# Supplementary material for: Structural insights into mechanism and specificity of the plant protein O-fucosyltransferase SPINDLY
Source: PubMed Central journal article supplement (PMC9715652; doi:10.1038/s41467-022-35234-0), 2022-12-02
Supplement: 41467_2022_35234_MOESM5_ESM.pdf [file 41467_2022_35234_MOESM5_ESM.pdf]

## Reporting Summary

Nature Portfolio wishes to improve the reproducibility of the work that we publish. This form provides structure for consistency and transparency in reporting. For further information on Nature Portfolio policies, see our [Editorial Policies](#) and the [Editorial Policy Checklist](#).

### Statistics

For all statistical analyses, confirm that the following items are present in the figure legend, table legend, main text, or Methods section.

n/a Confirmed

- |                                     |                                     |                                                                                                                                                                                                                                                            |
|-------------------------------------|-------------------------------------|------------------------------------------------------------------------------------------------------------------------------------------------------------------------------------------------------------------------------------------------------------|
| <input type="checkbox"/>            | <input checked="" type="checkbox"/> | The exact sample size ( $n$ ) for each experimental group/condition, given as a discrete number and unit of measurement                                                                                                                                    |
| <input type="checkbox"/>            | <input checked="" type="checkbox"/> | A statement on whether measurements were taken from distinct samples or whether the same sample was measured repeatedly                                                                                                                                    |
| <input checked="" type="checkbox"/> | <input type="checkbox"/>            | The statistical test(s) used AND whether they are one- or two-sided<br><i>Only common tests should be described solely by name; describe more complex techniques in the Methods section.</i>                                                               |
| <input checked="" type="checkbox"/> | <input type="checkbox"/>            | A description of all covariates tested                                                                                                                                                                                                                     |
| <input checked="" type="checkbox"/> | <input type="checkbox"/>            | A description of any assumptions or corrections, such as tests of normality and adjustment for multiple comparisons                                                                                                                                        |
| <input checked="" type="checkbox"/> | <input type="checkbox"/>            | A full description of the statistical parameters including central tendency (e.g. means) or other basic estimates (e.g. regression coefficient) AND variation (e.g. standard deviation) or associated estimates of uncertainty (e.g. confidence intervals) |
| <input checked="" type="checkbox"/> | <input type="checkbox"/>            | For null hypothesis testing, the test statistic (e.g. $F$ , $t$ , $r$ ) with confidence intervals, effect sizes, degrees of freedom and $P$ value noted<br><i>Give <math>P</math> values as exact values whenever suitable.</i>                            |
| <input checked="" type="checkbox"/> | <input type="checkbox"/>            | For Bayesian analysis, information on the choice of priors and Markov chain Monte Carlo settings                                                                                                                                                           |
| <input checked="" type="checkbox"/> | <input type="checkbox"/>            | For hierarchical and complex designs, identification of the appropriate level for tests and full reporting of outcomes                                                                                                                                     |
| <input checked="" type="checkbox"/> | <input type="checkbox"/>            | Estimates of effect sizes (e.g. Cohen's $d$ , Pearson's $r$ ), indicating how they were calculated                                                                                                                                                         |

*Our web collection on [statistics for biologists](#) contains articles on many of the points above.*

### Software and code

Policy information about [availability of computer code](#)

Data collection SSRF beamline BL17U and BL19U, Clinx Chemscope5600, Elite EClassical 3100, WYATT Technology HELEOS multi-angle light scattering instrument

Data analysis HKL2000 program, Coot (V0.8.9.2), Phenix program (V1.20.1), Pymol (V2.5.1), Molprobit (V4.5.1), PISA server (V1.52), Origin 8.0

For manuscripts utilizing custom algorithms or software that are central to the research but not yet described in published literature, software must be made available to editors and reviewers. We strongly encourage code deposition in a community repository (e.g. GitHub). See the Nature Portfolio [guidelines for submitting code & software](#) for further information.

### Data

Policy information about [availability of data](#)

All manuscripts must include a [data availability statement](#). This statement should provide the following information, where applicable:

- Accession codes, unique identifiers, or web links for publicly available datasets
- A description of any restrictions on data availability
- For clinical datasets or third party data, please ensure that the statement adheres to our [policy](#)

Atomic coordinates of Arabidopsis SPY/GDP complex have been deposited in the Protein Data Bank (PDB) under accession number 7Y4I [<http://doi.org/10.2210/pdb7y4i/pdb>]. Atomic coordinates of previously published structures used in this study are also available in PDB under accession numbers 7NTF [<http://doi.org/10.2210/pdb7ntf/pdb>], 4N3C [<http://doi.org/10.2210/pdb4n3c/pdb>], 4AY6 [<http://doi.org/10.2210/pdb4ay6/pdb>], 5DJS [<http://doi.org/10.2210/pdb5djs/pdb>], 2JLB [<http://doi.org/10.2210/pdb2jlb/pdb>], 3Q3H [<http://doi.org/10.2210/pdb3q3h/pdb>] and 5A01 [<http://doi.org/10.2210/pdb5a01/pdb>]. Source Data are

provided with this paper.

## Human research participants

Policy information about [studies involving human research participants and Sex and Gender in Research](#).

|                             |                                                            |
|-----------------------------|------------------------------------------------------------|
| Reporting on sex and gender | No human research participants were involved in the study. |
| Population characteristics  | No human research participants were involved in the study. |
| Recruitment                 | No human research participants were involved in the study. |
| Ethics oversight            | No human research participants were involved in the study. |

Note that full information on the approval of the study protocol must also be provided in the manuscript.

## Field-specific reporting

Please select the one below that is the best fit for your research. If you are not sure, read the appropriate sections before making your selection.

Life sciences  Behavioural & social sciences  Ecological, evolutionary & environmental sciences

For a reference copy of the document with all sections, see [nature.com/documents/nr-reporting-summary-flat.pdf](https://www.nature.com/documents/nr-reporting-summary-flat.pdf)

## Life sciences study design

All studies must disclose on these points even when the disclosure is negative.

|                 |                                                                                                  |
|-----------------|--------------------------------------------------------------------------------------------------|
| Sample size     | Sample sizes were chosen based on the typical number of replicates reported for similar studies. |
| Data exclusions | No data were excluded.                                                                           |
| Replication     | Experiments were repeated successfully at least 3 times.                                         |
| Randomization   | Samples were selected randomly.                                                                  |
| Blinding        | This is not applicable to the study.                                                             |

## Reporting for specific materials, systems and methods

We require information from authors about some types of materials, experimental systems and methods used in many studies. Here, indicate whether each material, system or method listed is relevant to your study. If you are not sure if a list item applies to your research, read the appropriate section before selecting a response.

### Materials & experimental systems

| n/a                                 | Involvement in the study                               |
|-------------------------------------|--------------------------------------------------------|
| <input type="checkbox"/>            | <input checked="" type="checkbox"/> Antibodies         |
| <input checked="" type="checkbox"/> | <input type="checkbox"/> Eukaryotic cell lines         |
| <input checked="" type="checkbox"/> | <input type="checkbox"/> Palaeontology and archaeology |
| <input checked="" type="checkbox"/> | <input type="checkbox"/> Animals and other organisms   |
| <input checked="" type="checkbox"/> | <input type="checkbox"/> Clinical data                 |
| <input checked="" type="checkbox"/> | <input type="checkbox"/> Dual use research of concern  |

### Methods

| n/a                                 | Involvement in the study                        |
|-------------------------------------|-------------------------------------------------|
| <input checked="" type="checkbox"/> | <input type="checkbox"/> ChIP-seq               |
| <input checked="" type="checkbox"/> | <input type="checkbox"/> Flow cytometry         |
| <input checked="" type="checkbox"/> | <input type="checkbox"/> MRI-based neuroimaging |

## Antibodies

|                 |                                                                                                                                                                                                                                                                                                                                                                                                                                                                                                              |
|-----------------|--------------------------------------------------------------------------------------------------------------------------------------------------------------------------------------------------------------------------------------------------------------------------------------------------------------------------------------------------------------------------------------------------------------------------------------------------------------------------------------------------------------|
| Antibodies used | Biotinylated Aleuria Aurantia Lectin (cat# B-1395) was purchased from Vector Laboratories. HRP-labeled Streptavidin (cat# B110053) was purchased from Sangon Biotech.                                                                                                                                                                                                                                                                                                                                        |
| Validation      | Biotinylated Aleuria Aurantia Lectin: 82 citations. <a href="https://vectorlabs.com/products/glycobiology/biotinylated-aleuria-aurantia-lectin-aal#biozbadges">https://vectorlabs.com/products/glycobiology/biotinylated-aleuria-aurantia-lectin-aal#biozbadges</a><br>HRP-labeled Streptavidin: our data show that this antibody reacts well in western blotting. <a href="https://www.sangon.com/productDetail?productInfo.code=B110053">https://www.sangon.com/productDetail?productInfo.code=B110053</a> |
